# Supplementary material
Source: PubMed Central journal article supplement (PMC7659021)

Supplemental Figure 1. Flowchart of study recruitment

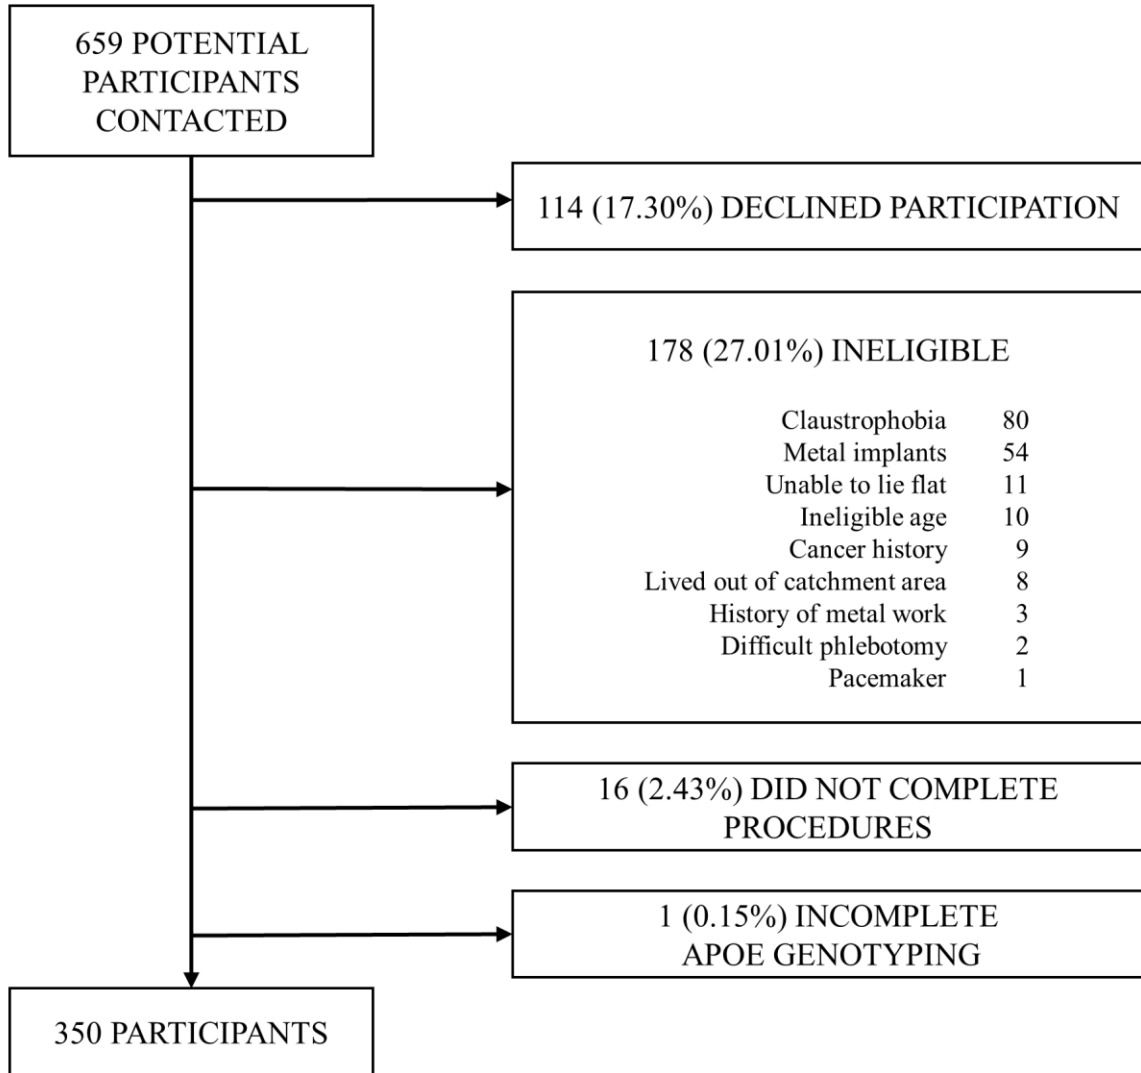

Supplemental Figure 2. Histograms showing the distribution of global brain amyloid standardized uptake value ratio (SUVR), with a solid line representing a non-parametric Kernel estimation. The dash line represents the amyloid positivity threshold (1.34) estimated using K means clustering.

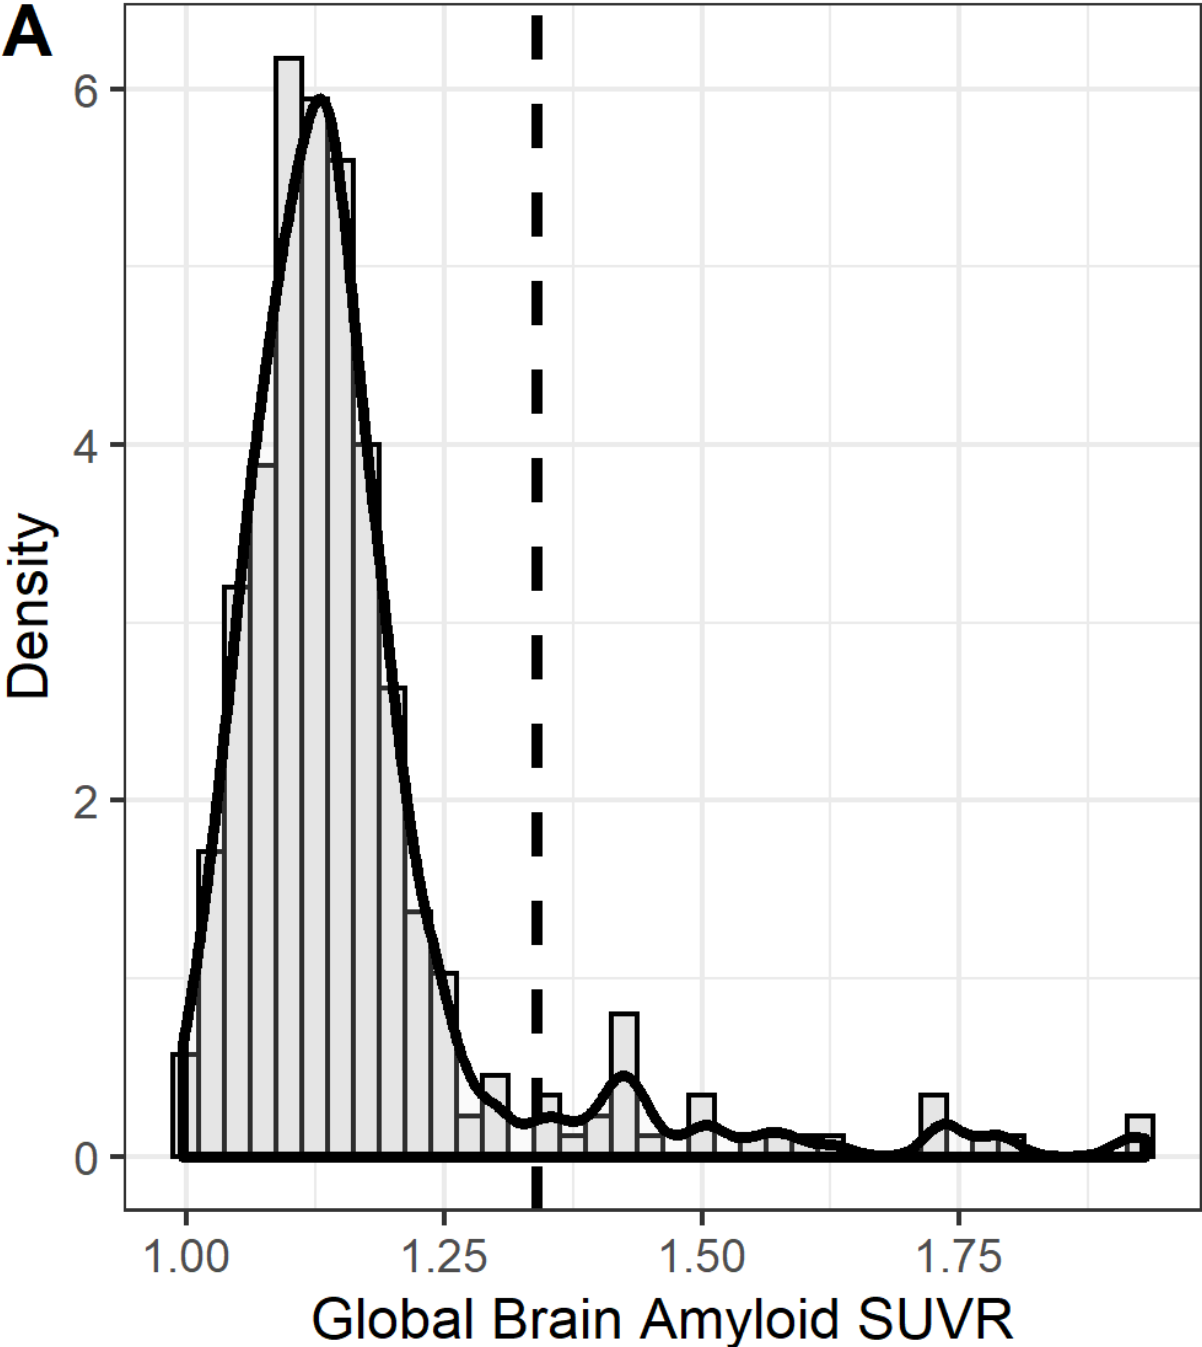

Supplement: NIHMS1642734-supplement-1.pdf [file NIHMS1642734-supplement-1.pdf]
